# Supplementary material for: The effect of the Sars-Cov-2 pandemic on the use of personal protective equipment in hospitals
Source: Springer Nature journal article supplement (doi:10.1007/s10163-023-01745-1), 2023-07-06

The effect of Sars-Cov-2 pandemic on the use of personal protective equipment in hospitals

# Supplementary Material

**Table S1. Representation rate of the chosen product in each product group**

| <b>Category</b>                                                                                                                                           | <b>Product group</b>                     | <b>2016</b> | <b>2017</b> | <b>2018</b> | <b>2019</b> | <b>2020</b> | <b>2021</b> | <b>Average</b> |
|-----------------------------------------------------------------------------------------------------------------------------------------------------------|------------------------------------------|-------------|-------------|-------------|-------------|-------------|-------------|----------------|
| <b>Body protection</b>                                                                                                                                    | <i>Protective gowns</i>                  | 94.4%       | 94.0%       | 94.8%       | 93.6%       | 93.0%       | 92.1%       | 93.7%          |
|                                                                                                                                                           | <i>Foil gowns</i>                        | 100.0%      | 100.0%      | 100.0%      | 100.0%      | 100.0%      | 100.0%      | 100.0%         |
|                                                                                                                                                           | <i>Surgical gowns</i>                    | 89.2%       | 91.9%       | 90.8%       | 88.0%       | 89.2%       | 67.7%       | 86.1%          |
|                                                                                                                                                           | <i>Washable gowns</i>                    | 100%        | 100%        | 100%        | 100%        | 100%        | 100%        | 100.0%         |
|                                                                                                                                                           | <i>Caps and headbands</i>                | 41.8%       | 34.9%       | 35.3%       | 32.4%       | 34.4%       | 50.1%       | 38.2%          |
| <b>Masks</b>                                                                                                                                              | <i>Surgical masks</i>                    | 8.4%        | 24.2%       | 47.9%       | 57.1%       | 80.9%       | 80.0%       | 49.8%          |
|                                                                                                                                                           | <i>Special mask</i>                      | 58.3%       | 80.3%       | 83.5%       | 73.7%       | 92.1%       | 98.7%       | 81.1%          |
|                                                                                                                                                           | <i>Washable masks</i>                    | 100%        | 100%        | 100%        | 100%        | 100%        | 100%        | 100.0%         |
| <b>Gloves</b>                                                                                                                                             | <i>Surgical sterile gloves, in pairs</i> | 18.7%       | 17.7%       | 14.1%       | 12.5%       | 14.8%       | 19.2%       | 16.2%          |
|                                                                                                                                                           | <i>Examination gloves</i>                | 44.3%       | 43.9%       | 43.2%       | 43.4%       | 42.7%       | 41.7%       | 43.2%          |
| Calculated as (consumption rate of the product/total consumption of the product group)<br>*mark that the representative product comes from the literature |                                          |             |             |             |             |             |             |                |

**Table S2. Number of different product in the same group**

| Category               | Product group                     | 2016 | 2017 | 2018 | 2019 | 2020 | 2021 |
|------------------------|-----------------------------------|------|------|------|------|------|------|
| <b>Body protection</b> | <i>Surgical gowns</i>             | 7    | 5    | 5    | 7    | 7    | 7    |
|                        | <i>Protective gowns</i>           | 7    | 4    | 4    | 4    | 9    | 11   |
|                        | <i>Foil aprons</i>                | 1    | 1    | 1    | 1    | 1    | 1    |
|                        | <i>Textile (washable) gowns</i>   | 0    | 0    | 0    | 1    | 1    | 1    |
|                        | <i>Hairnets &amp; caps</i>        | 10   | 11   | 11   | 10   | 12   | 11   |
| <b>Masks</b>           | <i>Surgical masks</i>             | 7    | 7    | 8    | 7    | 8    | 8    |
|                        | <i>Special masks</i>              | 2    | 2    | 2    | 2    | 4    | 5    |
|                        | <i>Textile (washable) masks</i>   | 0    | 0    | 0    | 0    | 1    | 0    |
| <b>Gloves</b>          | <i>Surgical gloves</i>            | 24   | 25   | 25   | 26   | 26   | 29   |
|                        | <i>Examination gloves</i>         | 33   | 25   | 41   | 35   | 36   | 36   |
| <b>Medical eyewear</b> | <i>Glass frames &amp; shields</i> | 2    | 2    | 3    | 3    | 5    | 5    |
|                        | <i>Viziers</i>                    | 1    | 1    | 1    | 1    | 1    | 1    |

**Table S3. Total consumption rates of eyewear**

| Product group                                 | 2016  | 2017  | 2018  | 2019  | 2020   | 2021   |
|-----------------------------------------------|-------|-------|-------|-------|--------|--------|
| <b>Glasses (frames and protective sheets)</b> | 3 388 | 3 892 | 3 507 | 2 923 | 18 503 | 6 674  |
| <b>Viziers</b>                                | 576   | 590   | 600   | 410   | 2 288  | 3 944  |
| <b>Total</b>                                  | 3 964 | 4 482 | 4 107 | 3 333 | 20 791 | 10 618 |

**Figure S1. Pictures of representative products**

**Protective gown**

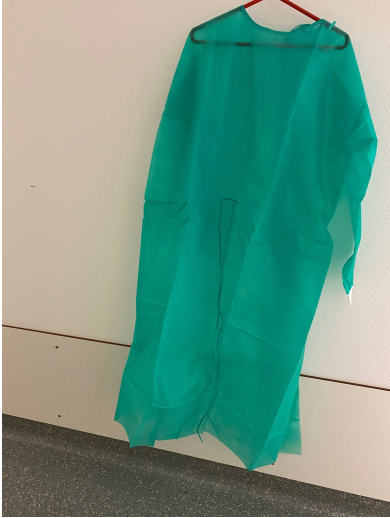

**Surgical gown**

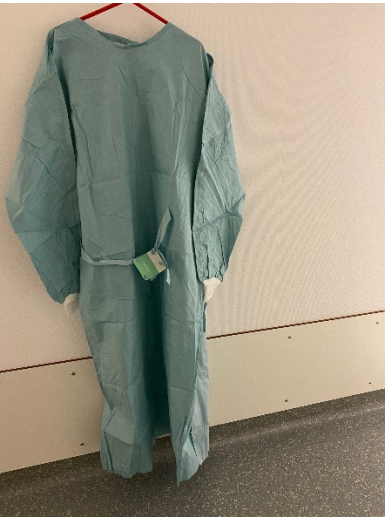

**Textile gown**

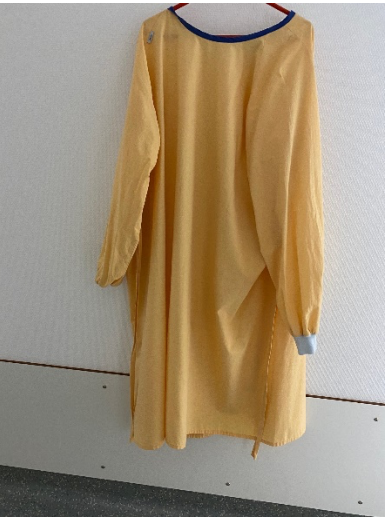

**Surgical cap**

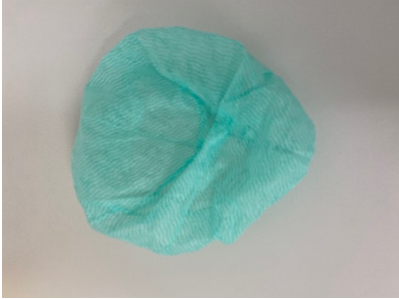

**Surgical mask**

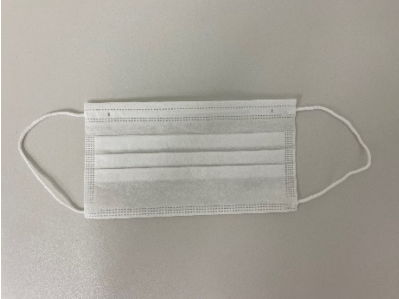

**Special mask**

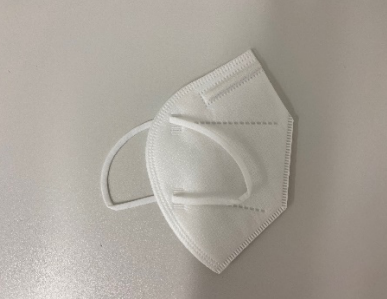

**Surgical gloves**

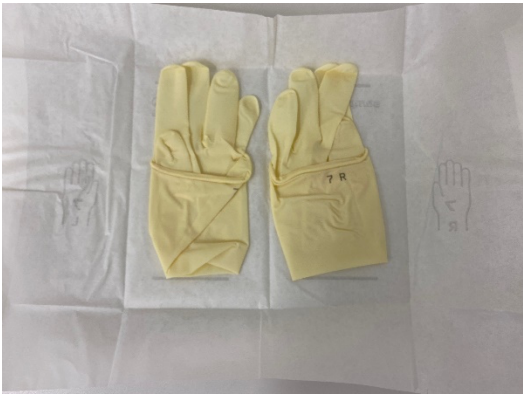

**Examination gloves**

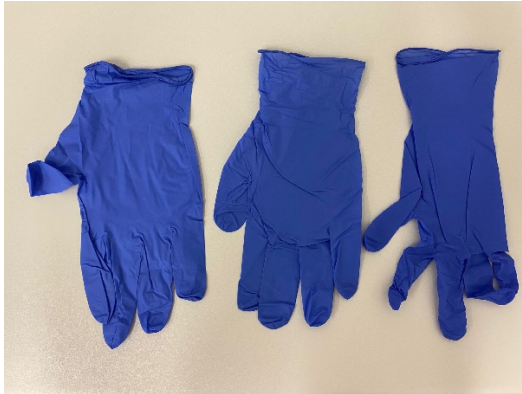

Supplement: MOESM1 [file 25584196]
